# Supplementary material for: Highly efficient electro-reduction of CO2 to formic acid by nano-copper
Source: Royal Society of Chemistry journal article supplement (doi:10.1039/c6ta04874a), 2016-01-01
Supplement: c6ta04874a1.pdf [file c6ta04874a1.pdf]

## Supplementary Information

### Highly efficient electro-reduction of CO<sub>2</sub> to formic acid by nano-copper

Kalyani Gupta, Marco Bersani and Jawwad A. Darr\*

\*Corresponding author: Professor Jawwad A. Darr  
j.a.darr@ucl.ac.uk

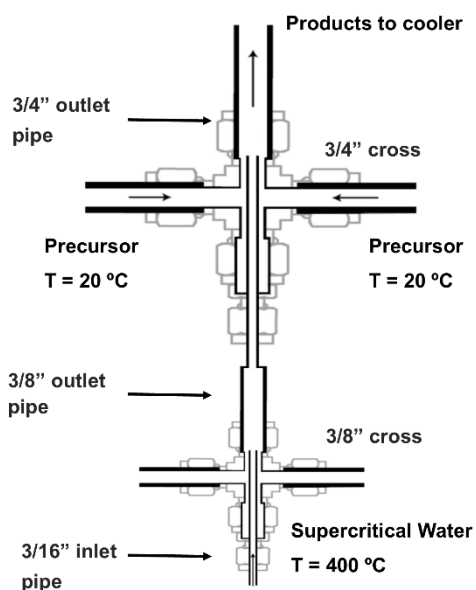

Figure S 1 - Schematic of the confined jet mixers with pipework and mixer sizes used to synthesise ultrafine CuO via continuous hydrothermal flow synthesis

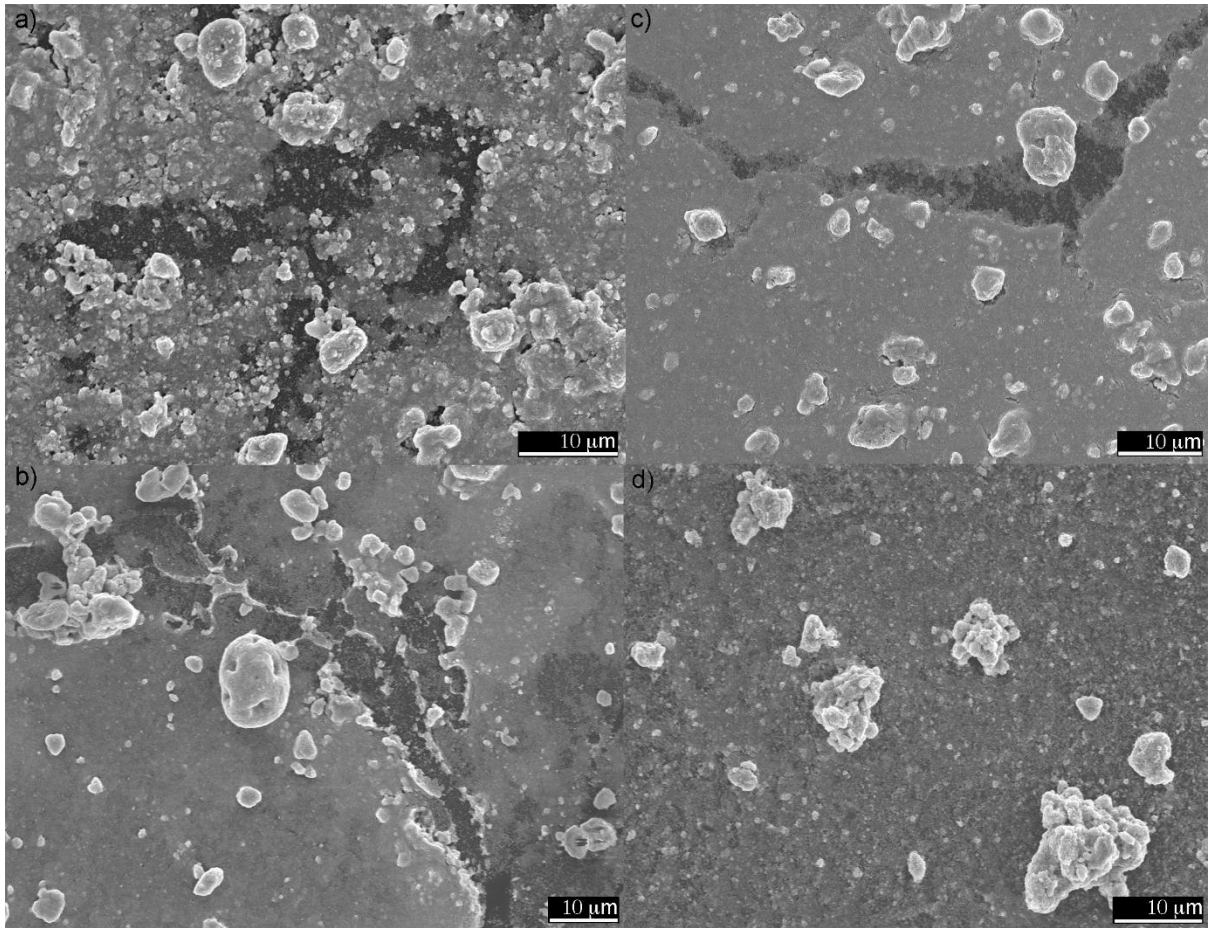

Figure S 2 - SEM of CuO deposited on glassy carbon electrode with a) 1 wt.%, b) 10 wt.%, c) 25 wt.% and d) 66 wt.% Nafion fraction before electrolysis

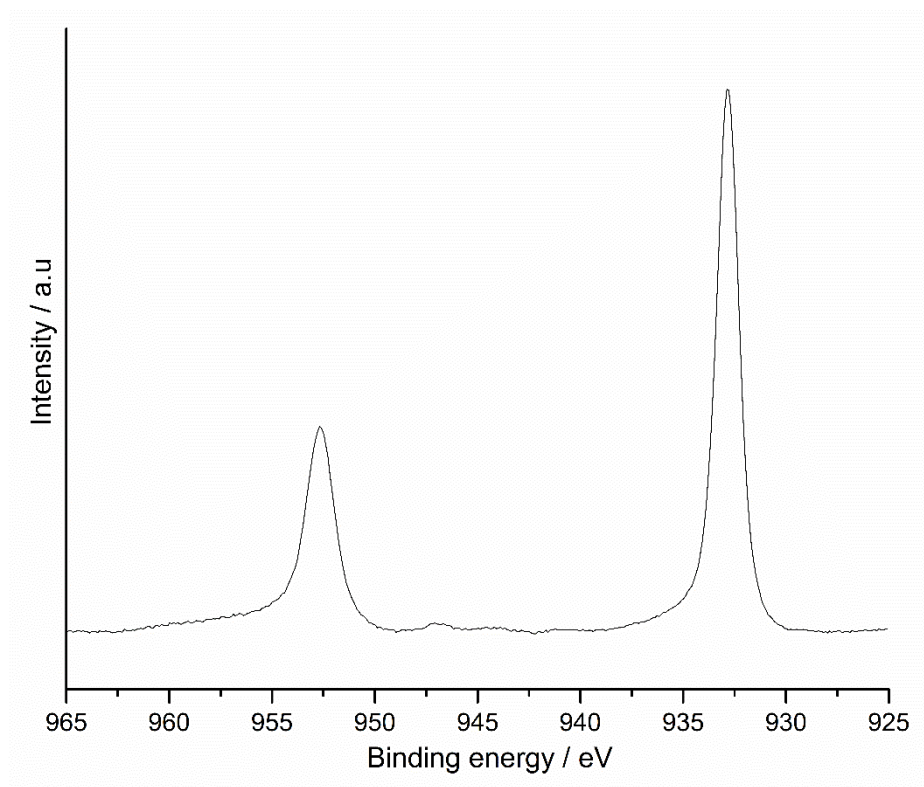

Figure S 3 - XPS spectra of CL1 post electrolysis (-1 V vs. Ag/AgCl for 3 hrs) showing Cu 2p 3/2 932.4 eV and Cu 2p 1/2 952.6 eV for Cu<sup>0</sup>. No satellite peaks typically seen with Cu<sup>II</sup> were observed, confirming the presence of Cu<sup>0</sup> on glassy carbon after electrolysis

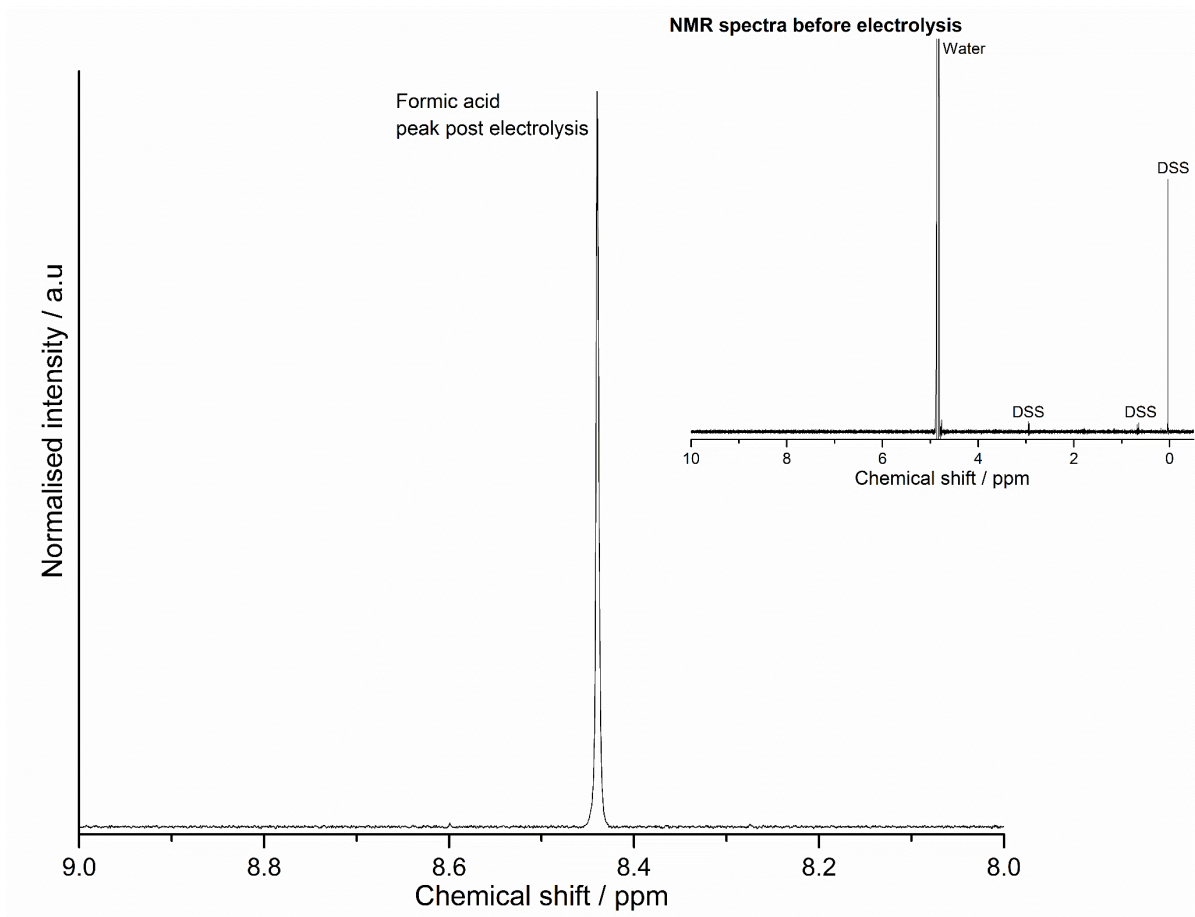

Figure S 4 -  $^1\text{H}$  NMR of formic acid formed during electrolysis using CL25 at -1.4 V vs. Ag/AgCl. Inset shows NMR spectra before electrolysis, DSS peaks are highlighted, where DSS was used as a reference control and strong water signal is observed at 4.75 ppm.

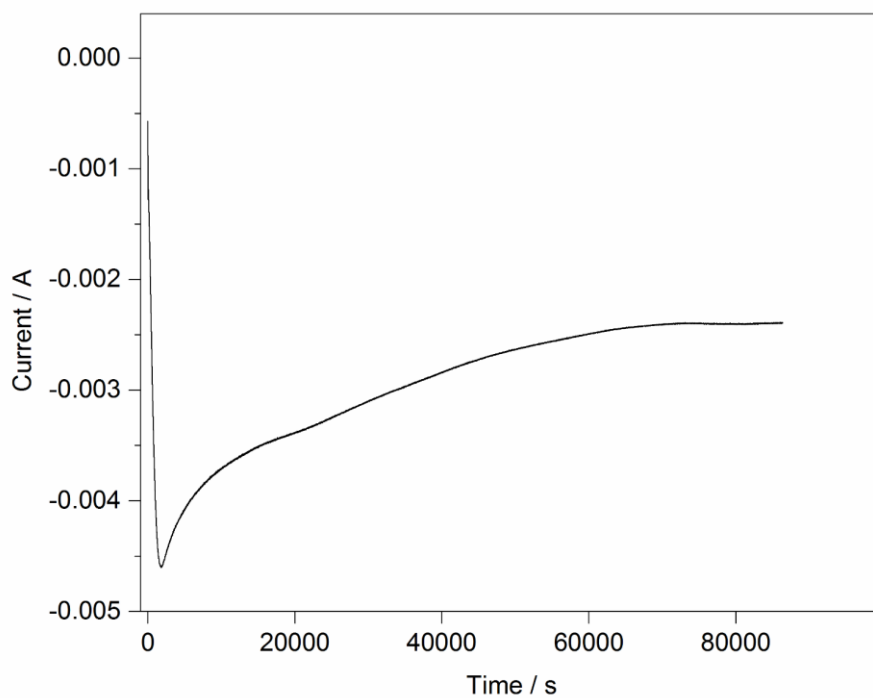

Figure S 5 – Long term stability test of sample CL25 held at -1.4 V vs. Ag/AgCl for 24 hours in  $\text{CO}_2$  saturated 0.5 M  $\text{KHCO}_3$  solution

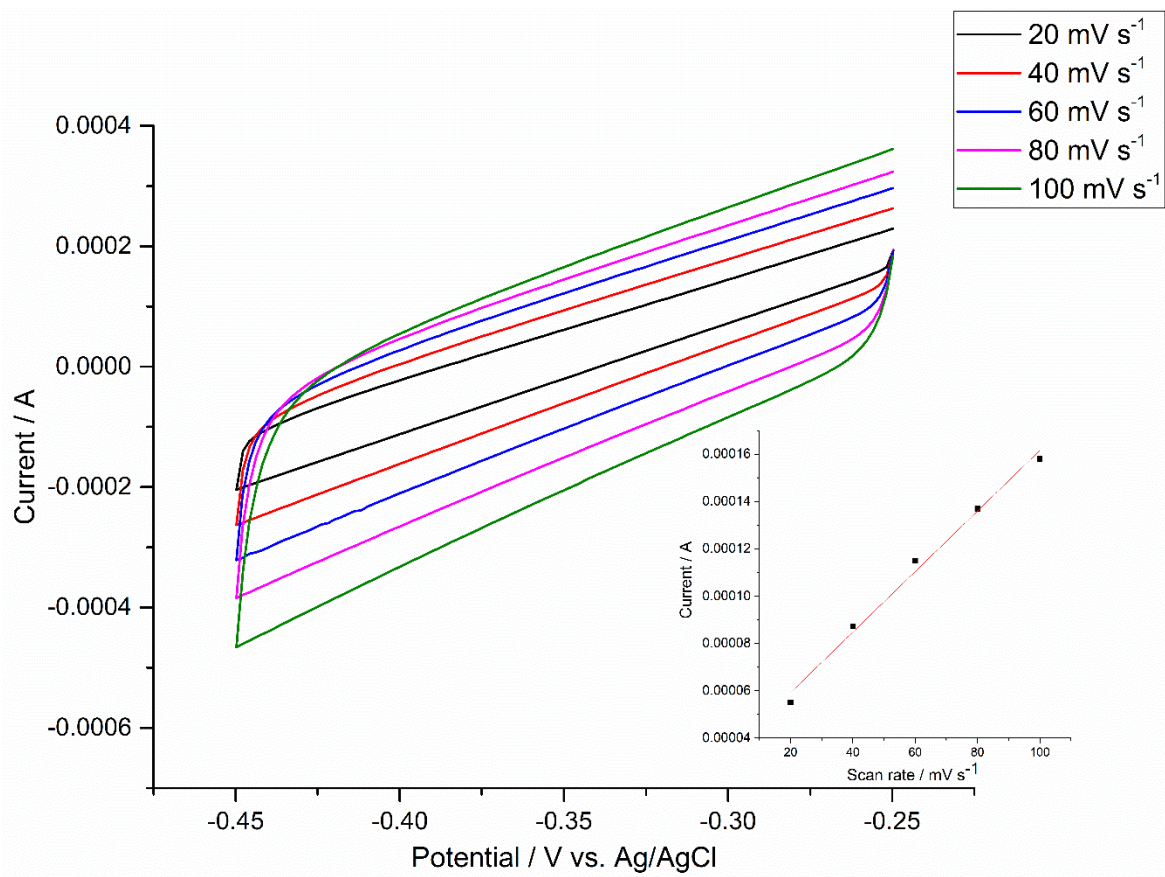

Figure S 6 - Plot of current vs potential of CL10 in 0.1 M H<sub>2</sub>SO<sub>4</sub> cycled between -0.25 and -0.45 V vs. Ag/AgCl at scan rates in the range of 20 – 100 mV s<sup>-1</sup>. Inset shows plot of current vs scan rate where the linear regression gives capacitance information

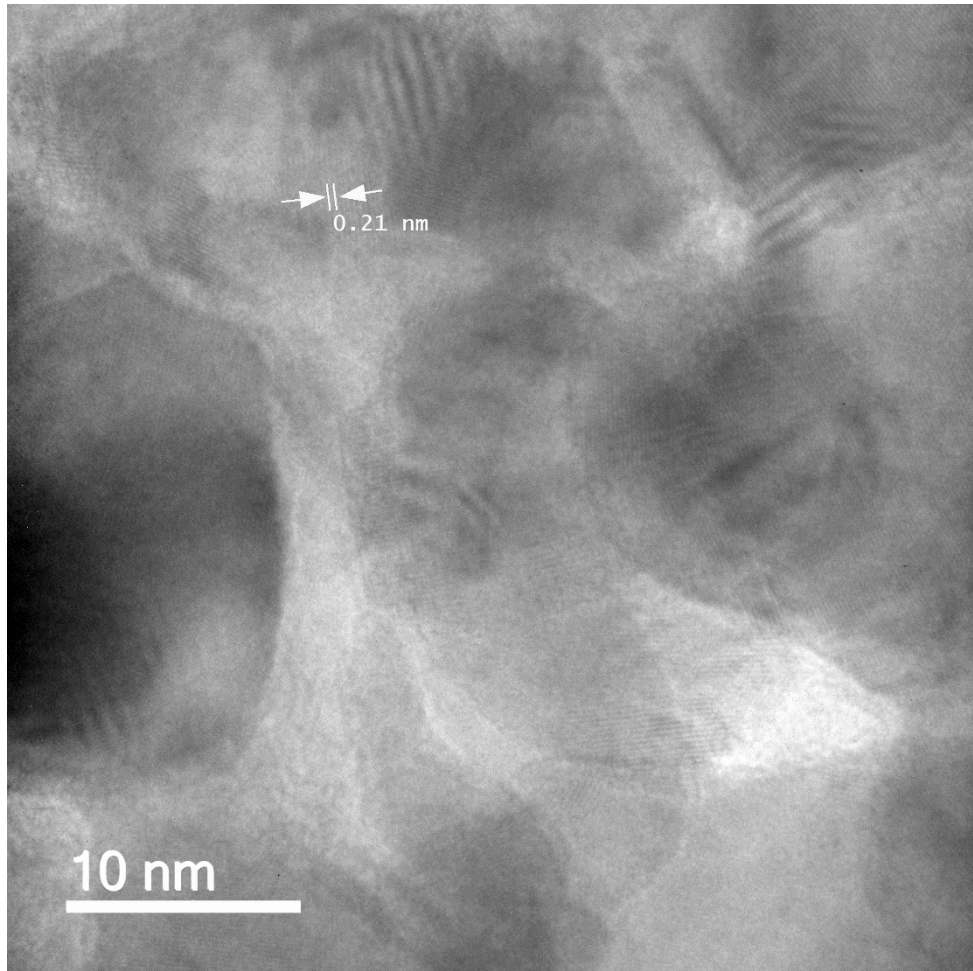

Figure S 7 - TEM of CL25 post electrolysis at -1 V for 3 hrs showing 111 surface plane with a d-spacing of 0.21 nm consistent with Cu  $d_{111}$

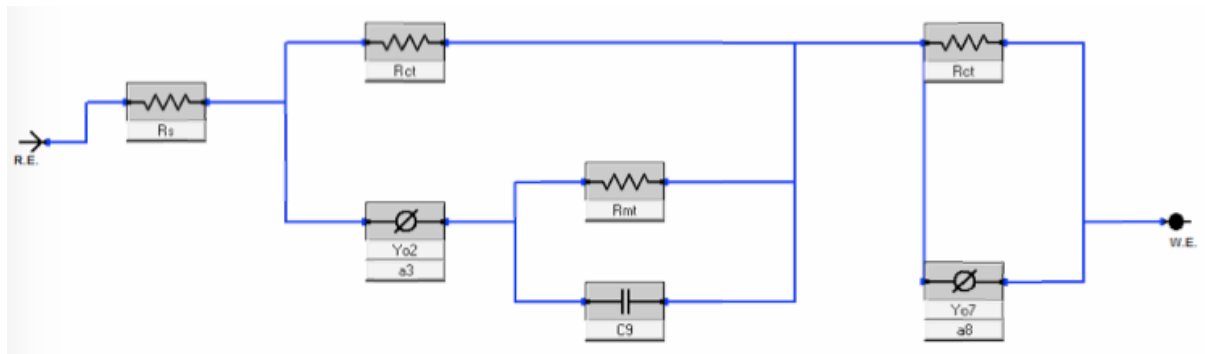

Figure S 8 - Equivalent circuit model of three electrode set up with nafion thin film coating on the glassy carbon electrode

| Sample | $R_{ct}$ ( $\Omega$ ) | $R_{mt}$ ( $\Omega$ ) |
|--------|-----------------------|-----------------------|
| CL10   | 16.9                  | Negligible            |
| CL25   | 14.1                  | 1.1                   |
| CL66   | 63.9                  | 9.6                   |

**Table S 1 - Simulated data values for model in Fig S7 showing  $R_{ct}$  and  $R_{mt}$  values for CL<sub>10</sub>, CL<sub>25</sub> and CL<sub>66</sub> at -1.4 V**
